# Supplementary material
Source: PubMed Central journal article supplement (PMC3957595)
Supplement: AEM.03338-13_zam999105138so1.pdf [file AEM.03338-13_zam999105138so1.pdf]

## Supplementary 1. **Calculation of insect nitrogen available to plants through EIPF**

The estimated amount of atmospheric nitrogen that is fixed in an ecosystem varies between 10-160 kg/ha/yr (1). Approximately 31% of this fixed, plant incorporated, nitrogen is then lost to insect herbivores (2). Therefore the amount of plant nitrogen lost through insect herbivory varies between 3.1kg/ha/yr ( $10\text{kg/ha/yr} \times 0.31$ ) to 49.6kg/ha/yr ( $160\text{kg/ha/yr} \times 0.31$ ). It is estimated that insects are able to incorporate 50% of ingested nitrogen (3), therefore the amount of plant nitrogen incorporated into insect biomass varies between 1.55kg/ha/yr ( $10\text{kg/ha/yr} \times 0.31$ ) to 24.8kg/ha/yr ( $160\text{kg/ha/yr} \times 0.31$ ).

We then estimated that approximately 30% of soil insects may become infected by EIPF (4) however this number could be as high as 66%. Therefore, the amount of insect derived nitrogen potentially provided to plants by EIPF varies between 0.465kg/ha/yr ( $1.55\text{kg/ha/yr} \times 0.30$ ) and 7.44kg/ha/yr ( $24.8\text{kg/ha/yr} \times 0.30$ ).

We then calculated that the percentage of the total fixed nitrogen provided to plants through EIPF as 4.65%. That is  $0.93\text{kg/ha/yr/insect derived nitrogen provided to plants through EIPF}$  divided by  $10\text{kg/ha/yr average atmospheric fixed nitrogen}$ . Similarly,  $7.44\text{kg/ha/yr insect derived nitrogen provided to plants through EIPF}$  divided by  $160\text{kg/ha/yr average atmospheric fixed nitrogen in an ecosystem}$  is also 4.65%.

References:

1. **Boring LR, Swank WT, Waide JB, Henderson GS.** 1988. Sources, fates, and impacts of nitrogen inputs to terrestrial ecosystems: review and synthesis. *Biogeochemistry*. **6**:119-59.
2. **Lovett M, Christenson LM, Groffman PM, Jones CG, Hart JE, Mitchell MJ.** 2002. Insect defoliation and nitrogen cycling in forests. *Bioscience*. **52**:335-341.
3. **Fox LR, Macauley BJ.** 1977. Insect grazing on *Eucalyptus* in response to variation in leaf tannins and nitrogen. *Oecologia*. **29**:145-162
4. **Bidochka MJ, Kasperski JE, Wild GAM.** 1998. Occurrence of the entomopathogenic fungi *Metarhizium anisopliae* and *Beauveria bassiana* in soils from temperate and near-northern habitats. *Can. J. Bot.* **76**:1198–1204
